# Supplementary material for: A perception of ferro- and antiferromagnetic interactions in a two dimensional Ni(ii) heterochiral coordination polymer showing unusual CO2 uptake behavior
Source: Royal Society of Chemistry journal article supplement (doi:10.1039/c4dt02496f), 2014-01-01
Supplement: c4dt02496f1.pdf [file c4dt02496f1.pdf]

## Supporting Information

### A Perception of Ferro- and Antiferromagnetic Interaction in a Two Dimensional Ni(II) Heterochiral Coordination Polymer Showing Unusual CO<sub>2</sub> Uptake behavior

Himanshu Sekhar Jena, Soumyabrata Goswami, Suresh Sanda, Srinivasulu Parshamoni, Soumava Biswas, Sanjit Konar\*

Department of Chemistry, IISER Bhopal, Indore By-pass Road, Bhauri, Bhopal – 462066, Madhya Pradesh - India. Fax: +91-755-6692392; Tel: +91-755-6692339; E-mail: [skonar@iiserb.ac.in](mailto:skonar@iiserb.ac.in)

#### Materials and Methods

All the solvents and reagents were purchased from commercial sources and used as received. Acetyl pyridine, NaN(CN)<sub>2</sub>, (Aldrich, USA); 2-hydroxybenzaldehyde, NiCl<sub>2</sub>·6H<sub>2</sub>O, hydroxylamine hydrochloride and Zn dust (Merck India Ltd) and solvents were used as received without further purification. (R,S) phenyl(2-pyridyl)methaneamine and (R, S) 2-((phenyl(2-pyridyl)methylimino)methyl)phenol (LH) were prepared using our earlier reported procedures.<sup>1</sup>

#### Physical Measurements

Magnetic measurements were performed using a Quantum Design SQUID VSM magnetometer. The measured values were corrected for the experimentally measured contribution of the sample holder, while the derived susceptibilities were corrected for the diamagnetism of the samples, estimated from Pascal's tables.<sup>2</sup> Elemental analysis was performed on an Elementar vario Micro Cube instrument. IR spectrum was recorded on a Perkin-Elmer spectrometer from KBr pellets. Thermogravimetric analyses of both the complexes were recorded on a Perkin-Elmer TGA 4000 instrument in the temperature range of 30 – 900 °C under N<sub>2</sub> flow with a heating rate of 10 °C min<sup>-1</sup>. Powder X-ray diffraction (PXRD) data were collected on a PANalytical EMPYREAN instrument using Cu-K $\alpha$  radiation. Gas adsorption measurements were performed by using BelSorpmax (BEL Japan) automatic volumetric adsorption instrument. All the gases used were of Ultra-pure research grade (99.999%). Before every measurement sample was pretreated for 24 hrs at 373 K under 10<sup>-2</sup> KPa continuous vacuum using BelPrepvac II and purged with N<sub>2</sub> on cooling. CO<sub>2</sub>, CH<sub>4</sub> isotherms were measured at 195 K (Dry ice-MeOH cold bath) and 273 K (Julabo chiller with Ethylene glycol-water mixture as a coolant).

#### X-ray Crystallography

Suitable single crystals of complex 1 was mounted on a Bruker SMART diffractometer equipped with a graphite monochromator and Mo-K $\alpha$  ( $\lambda = 0.71073 \text{ \AA}$ , 296 K) radiation. Data collection was performed using  $\phi$  and  $\omega$  scan. The structure was solved using direct methods followed by full matrix least square refinements against F<sup>2</sup> (all data HKLF 4 format) using SHELXTL.<sup>3</sup> Subsequent difference Fourier synthesis and least-square refinement revealed the positions of the remaining non-hydrogen atoms.

Determinations of the crystal system, orientation matrix, and cell dimensions were performed according to the established procedures. Lorentz polarization and multi-scan absorption correction were applied. Non-hydrogen atoms were refined with independent anisotropic displacement parameters and hydrogen atoms were placed geometrically and refined using the riding model. All calculations were carried out using SHELXL 97,<sup>4</sup> PLATON 99,<sup>5</sup> and WinGX systemVer-1.64.<sup>6</sup>

### Synthesis of complex 1:

To a methanol (10 mL) solution of NiCl<sub>2</sub>·6H<sub>2</sub>O (0.948 g, 4.0 mmol) was added LH (1 g, 4.0 mmol) dissolved in methanol (30 mL). To this mixture Et<sub>3</sub>N (0.404 g, 4.0 mmol) was added and the resulting mixture was stirred for 2h. Solid sodium dicyanamide (0.356 g, 4.0 mmol) was added and the solution heated at reflux for 1h. The solvent was removed and the green residue was washed with ice-cold methanol. Yield: 1.04 g (69%). Single crystals of 1 suitable for X-ray diffraction study were obtained by layering the CH<sub>3</sub>CN solution of the crude green solid over dichloromethane. Anal. Calc. for C<sub>32</sub>H<sub>26</sub>N<sub>10</sub>O<sub>2</sub>Ni<sub>2</sub>: C, 54.91; H, 3.74; N, 20.01%. Found: C, 54.67; H, 3.46; N, 19.65%. Selected IR (KBr, cm<sup>-1</sup>) bands: 3432, 2274, 2165 (dicyanamide), 1623, 1598, 1412, 1327, 1050, 902, 764, 754.

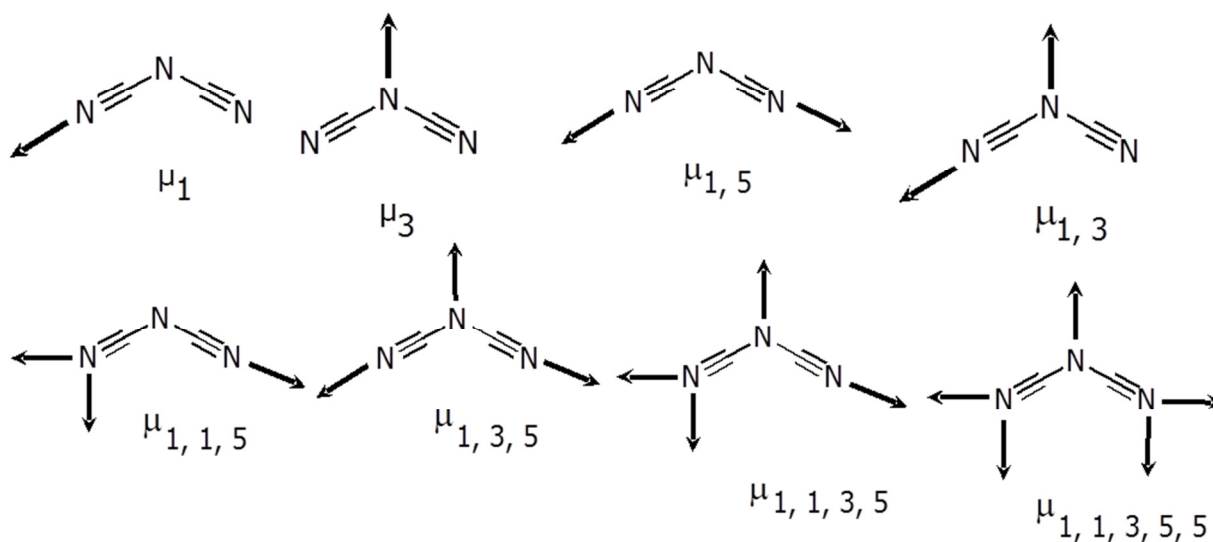

**Scheme 1.** Illustration of different bridging modes of dicyanamide ion.

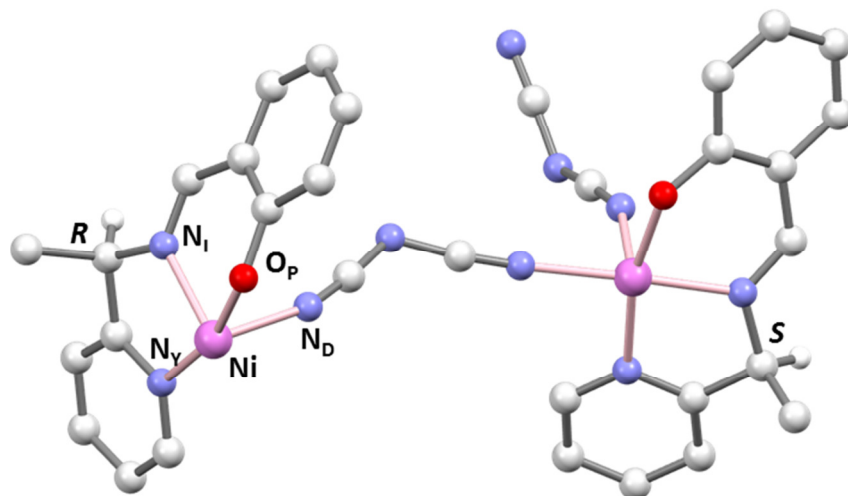

**Fig. S1.** Asymmetric unit of the complex **1**. Colour Codes: Ni(magenta), O(red), C(gray), N(blue).

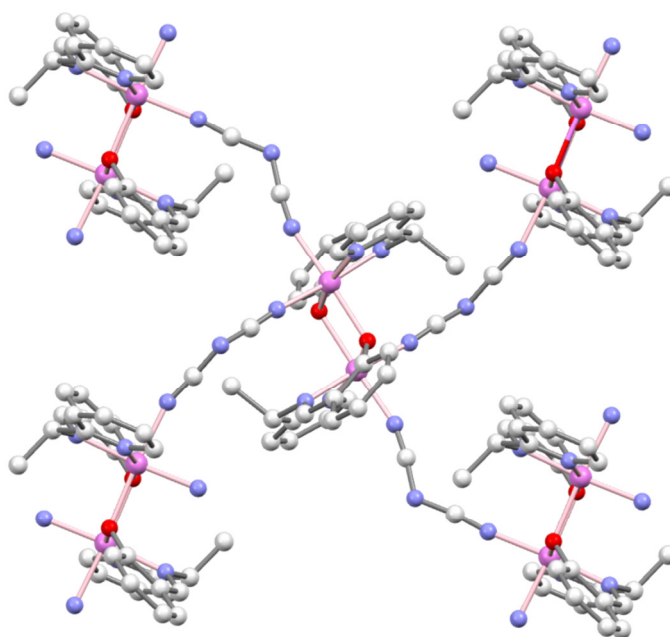

**Fig. S2.** Illustration of a single heterochiral dimer linked to four other dimers by dicyanamide bridge found in complex **1**. Colour codes same as Fig. S1.

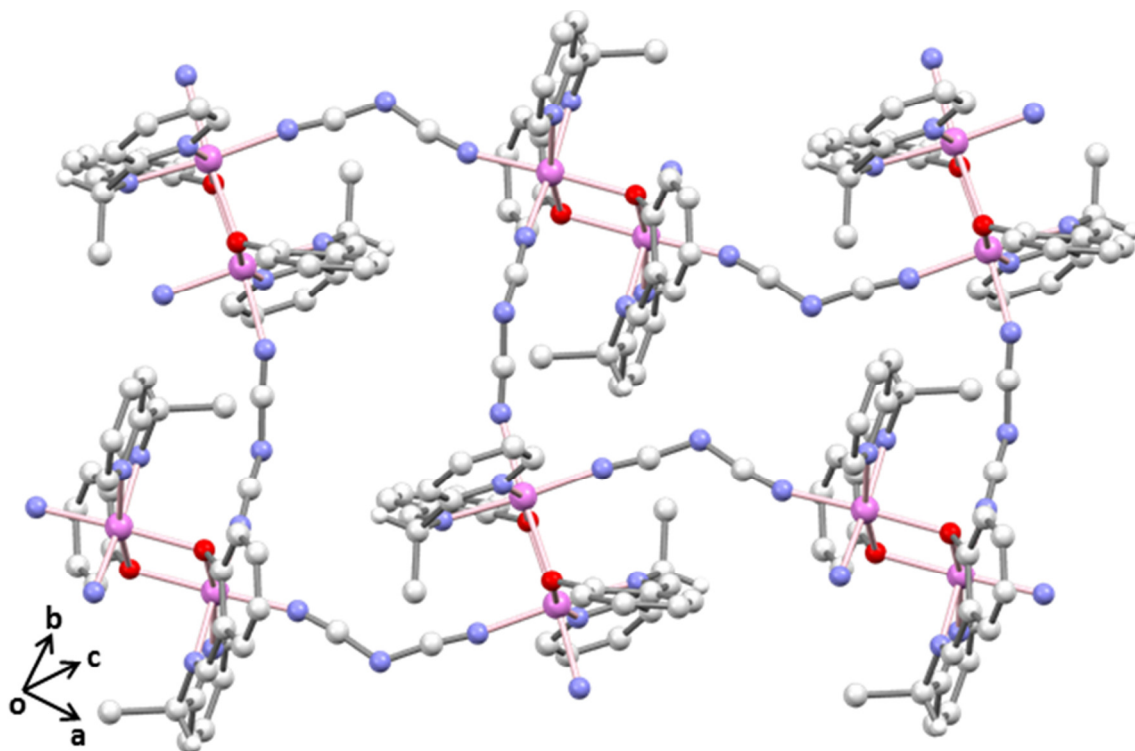

**Fig. S3.** Illustration of a two dimensional coordination polymer found in complex 1. Colour codes same as Fig. S1.

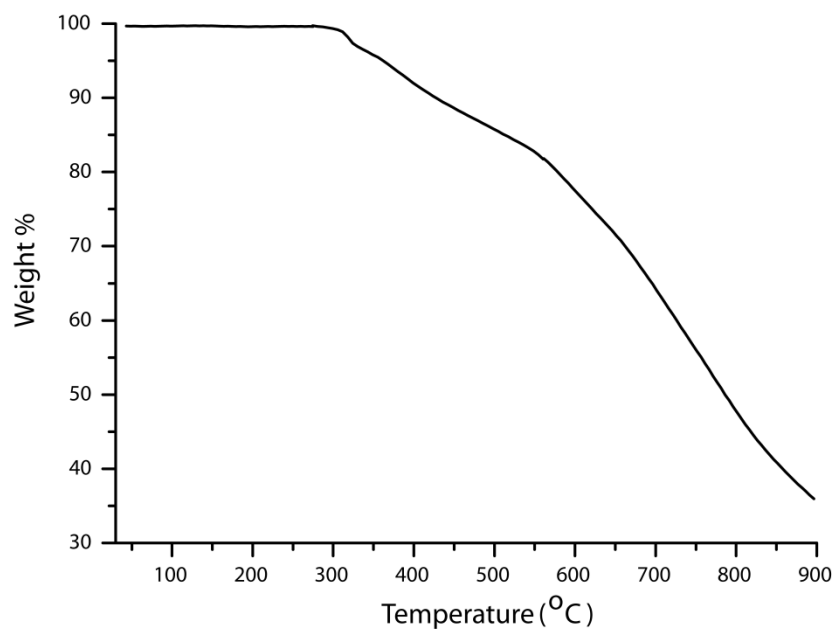

**Fig. S4.** TGA profile of complex 1.

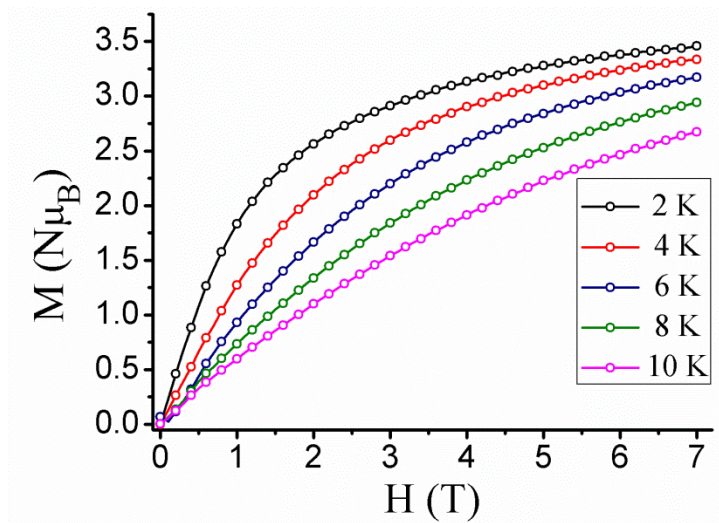

Fig. S5. Field-dependencies of isothermal magnetization plots for complex 1.

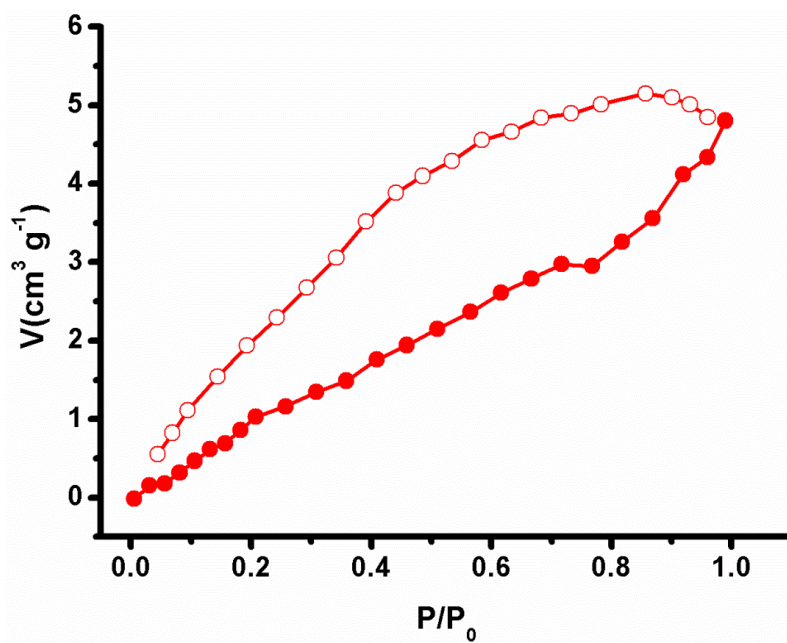

Fig. S6. N<sub>2</sub> adsorption isotherms of complex 1 at 77 K.

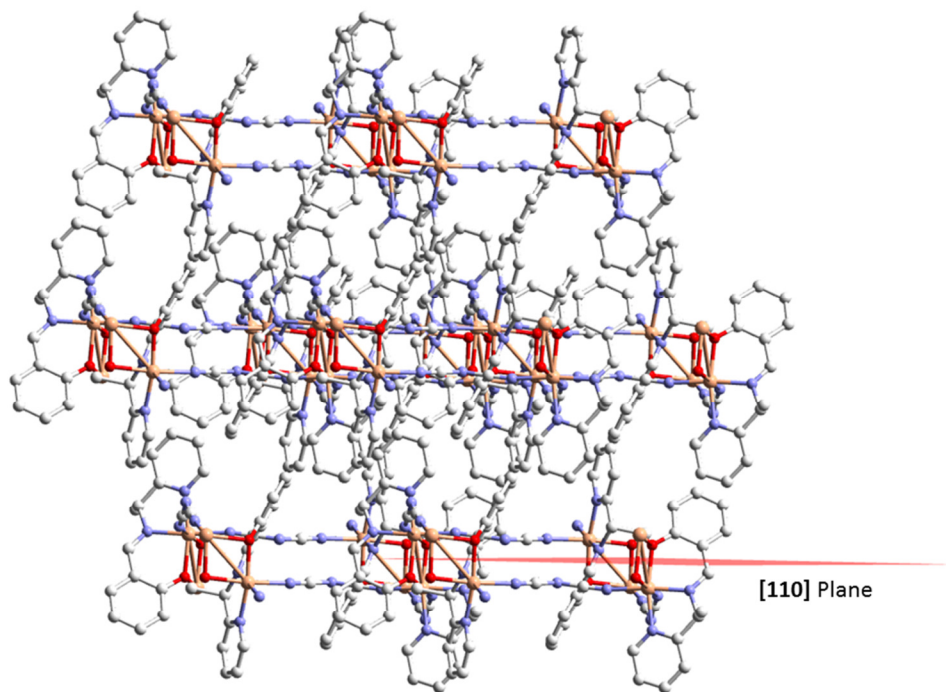

Fig. S7. Illustration of [110] plane found in complex 1.

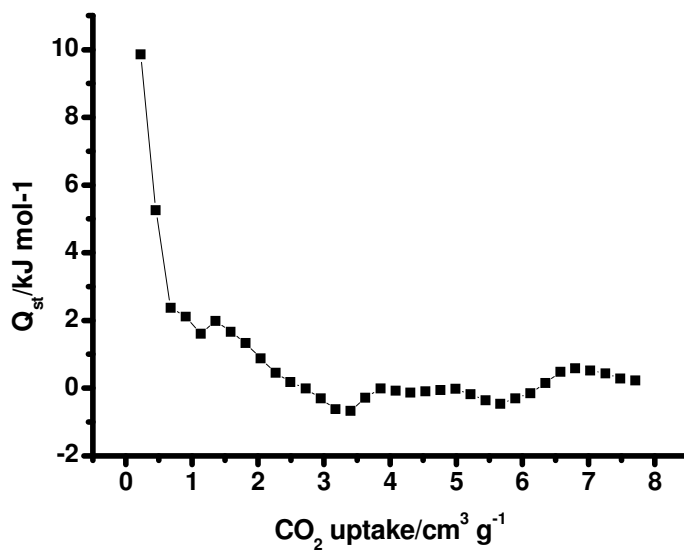

Fig. S8. Isosteric heat of adsorption for complex 1 obtained from  $\text{CO}_2$  sorption data at 273 K and 298 K.

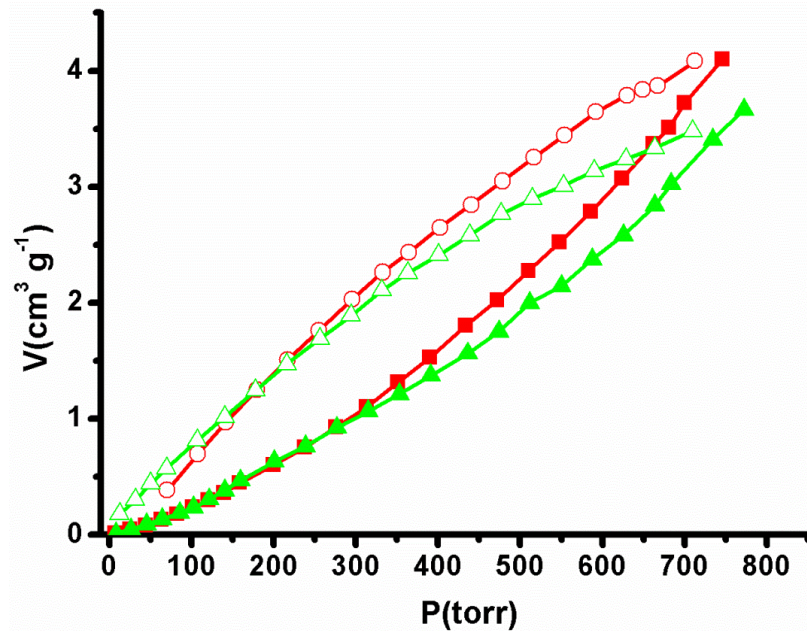

Fig. S9. CH<sub>4</sub> adsorption isotherms of complex 1 at 298 K (red), 273 K (green).

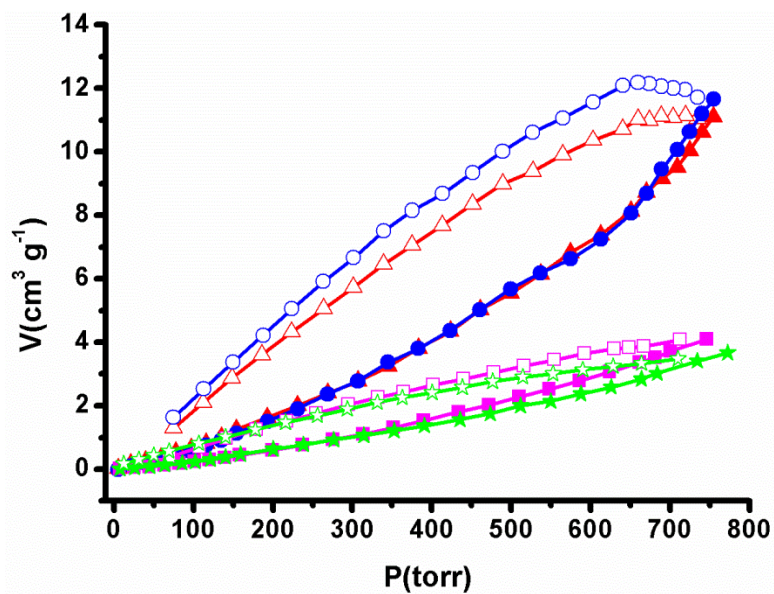

Fig. S10. Gas sorption isotherms at around room temperature, CO<sub>2</sub> at 273 K (red), 298 K (blue) and CH<sub>4</sub> at 273 K (green), 298 K (magenta).

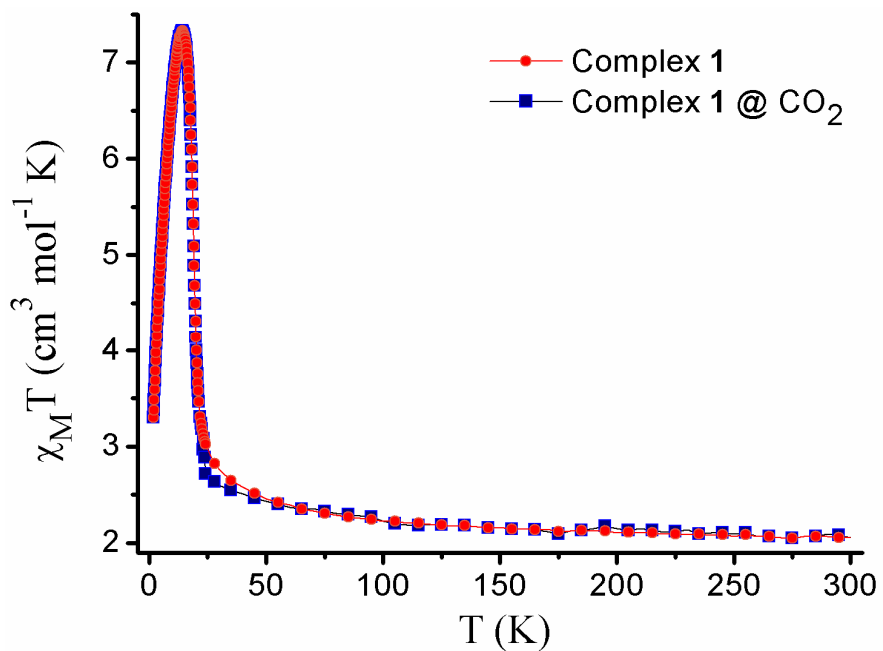

**Fig. S10.** Temperature dependence of the DC susceptibility for complex **1** and CO<sub>2</sub> loaded complex **1** (complex **1**@CO<sub>2</sub>).

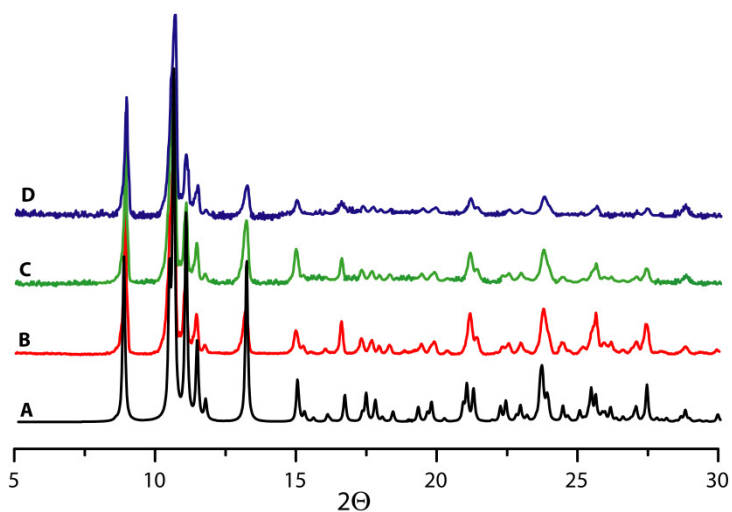

**Fig. S11.** PXRD patterns of complex **1** at 298 K; (A) as-synthesized, (B) Activated, (C) CO<sub>2</sub> loaded complex **1** and (D) after CO<sub>2</sub> desorption.



**Table 1.** Summary of X-ray Crystallographic Data for complex 1.

|                                                                                                                                |                                                                                |
|--------------------------------------------------------------------------------------------------------------------------------|--------------------------------------------------------------------------------|
| CCDC number                                                                                                                    | 1014355                                                                        |
| Molecular Formula                                                                                                              | C <sub>32</sub> H <sub>26</sub> N <sub>10</sub> Ni <sub>2</sub> O <sub>2</sub> |
| Formula Mass (g/M)                                                                                                             | 700.01                                                                         |
| Wavelength (Å)                                                                                                                 | 0.71073                                                                        |
| Temperature (K)                                                                                                                | 296(2)                                                                         |
| Crystal system                                                                                                                 | Triclinic                                                                      |
| Space group                                                                                                                    | P-1                                                                            |
| a /Å                                                                                                                           | 11.4696(4)                                                                     |
| b /Å                                                                                                                           | 11.6432(5)                                                                     |
| c /Å                                                                                                                           | 13.4883(5)                                                                     |
| α (°)                                                                                                                          | 84.488(2)                                                                      |
| β (°)                                                                                                                          | 82.801(2)                                                                      |
| γ (°)                                                                                                                          | 61.108(2)                                                                      |
| V/ Å <sup>3</sup>                                                                                                              | 1563.33(10)                                                                    |
| Z                                                                                                                              | 2                                                                              |
| D <sub>c</sub> / gcm <sup>-3</sup>                                                                                             | 1.487                                                                          |
| μ (Mo-K <sub>α</sub> )/mm <sup>-1</sup>                                                                                        | 1.252                                                                          |
| F(000)                                                                                                                         | 720.0                                                                          |
| Total reflection                                                                                                               | 7832                                                                           |
| Unique reflection                                                                                                              | 6258                                                                           |
| GOOF on F <sup>2</sup>                                                                                                         | 1.003                                                                          |
| R1 <sup>a</sup> [I>2σ]                                                                                                         | 0.0510                                                                         |
| wR2 <sup>b</sup> [I>2σ]                                                                                                        | 0.1172                                                                         |
| <sup>a</sup> R1 = $\sum   F_o  -  F_c   / \sum  F_o $ & <sup>b</sup> wR2 = $[\sum w( F_o ^2 -  F_c ^2) / \sum w(F_o)^2]^{1/2}$ |                                                                                |

**Table 2.** Selected bond distances (Å) and angles (°) found in complex 1.

| 1           |          |             |          |  |
|-------------|----------|-------------|----------|--|
| Ni1–N1      | 2.089(4) | Ni2–N3      | 2.083(4) |  |
| Ni1–N2      | 2.021(4) | Ni2–N4      | 2.029(3) |  |
| Ni1–N5      | 2.037(4) | Ni2–N7      | 2.090(4) |  |
| Ni1–N8      | 2.110(3) | Ni2–N10     | 2.057(4) |  |
| Ni1–O1      | 2.037(4) | Ni2–O2      | 2.029(4) |  |
| Ni1–O1A     | 2.147(3) | Ni2–O2A     | 2.140(3) |  |
| Ni1…Ni1A    | 3.182(1) | Ni2…Ni2A    | 3.148(1) |  |
| N1–Ni1–N2   | 79.3(1)  | N3–Ni2–N4   | 79.6(1)  |  |
| N1–Ni1–N5   | 96.1(2)  | N3–Ni2–N7   | 92.3(2)  |  |
| N1–Ni1–N8   | 88.6(2)  | N3–Ni2–N10  | 95.3(2)  |  |
| N1–Ni1–O1   | 166.9(1) | N3–Ni2–O2   | 166.2(1) |  |
| N1–Ni1–O1A  | 94.8(1)  | N3–Ni2–O2A  | 92.5(1)  |  |
| N2–Ni1–N5   | 174.6(2) | N4–Ni2–N7   | 86.8(2)  |  |
| N2–Ni1–N8   | 90.9(2)  | N4–Ni2–N10  | 174.0(1) |  |
| N5–Ni1–N8   | 86.1(2)  | N4–Ni2–O2   | 88.0(1)  |  |
| N2–Ni1–O1   | 88.4(1)  | N4–Ni2–O2A  | 92.8(1)  |  |
| N2–Ni1–O1A  | 93.2(1)  | N7–Ni2–N10  | 90.3(2)  |  |
| N5–Ni1–O1   | 96.4(2)  | N7–Ni2–O2   | 93.1(2)  |  |
| N5–Ni1–O1A  | 90.1(2)  | N7–Ni2–O2A  | 175.1(2) |  |
| N8–Ni1–O1   | 96.4(2)  | N10–Ni2–O2  | 97.4(1)  |  |
| N8–Ni1–O1A  | 175.1(2) | N10–Ni2–O2A | 90.5(1)  |  |
| O1–Ni1–O1A  | 81.0(1)  | O2–Ni2–O2A  | 82.0(1)  |  |
| Ni1–O1–Ni1A | 99.0(1)  | Ni2–O2–Ni2A | 98.0(1)  |  |

**Reference:**

- (1) H. S. Jena, J. Subramanian, V. Manivannan, *Inorg. Chim. Acta* 2011, **365**, 177.
- (2) O. Kahn, *Molecular Magnetism*, VCH, New York, 1993.
- (3) G. M. Sheldrick, SHELXTL, *Program for the Solution of Crystal of Structures*, University of Göttingen, Göttingen, Germany, 1993.
- (4) G. M. Sheldrick, SHELXL 97, *Program for Crystal Structure Refinement*, University of Göttingen, Göttingen, Germany, 1997.
- (5) A. L. Spek, *J. Appl. Crystallogr.* 2003, **36**, 7.
- (6) L. J. Farrugia, *J. Appl. Crystallogr.* 1999, **32**, 837.
